# Supplementary material for: Menstrual blood-derived stem cells and its mitochondrial treatment improve the ovarian condition of aged mice
Source: publisher site journal article supplement (doi:10.18632/aging.204043), 2022-05-03
Supplement: Supplementary file [file aging-v14i9-204043-supplementary-material-SD1.pdf]

## SUPPLEMENTARY FIGURE

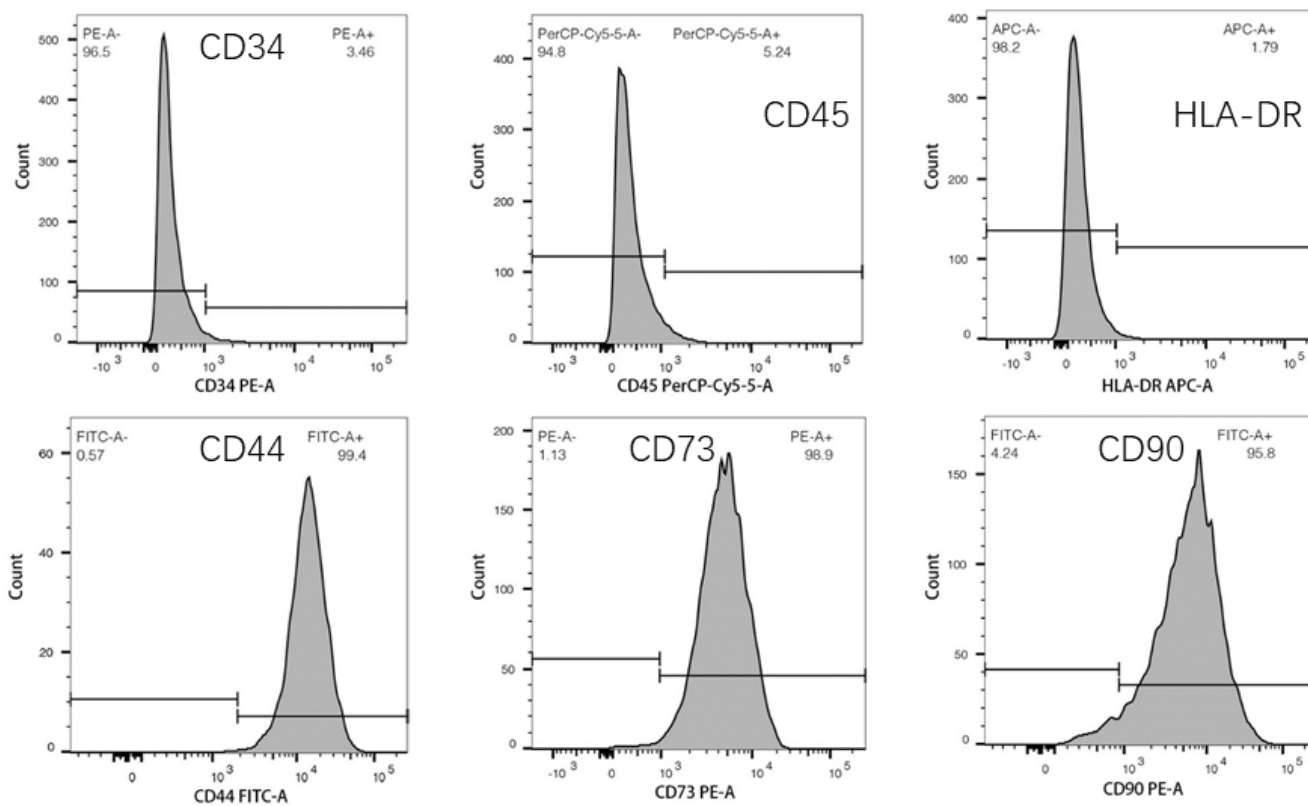

**Supplementary Figure 1. Flow-cytometric detection of surface markers of fourth-generation MenSCs.** All horizontal coordinates in the figure indicate fluorescence intensity, and all vertical coordinates indicate cell counts.
